# Supplementary material for: End Stage Renal Failure Patients With Hemophilia Treated With Peritoneal Dialysis: A Case Series
Source: PubMed Central journal article supplement — Kidney Int Rep. 2022 Sep 30;7(12):2639–46. doi: 10.1016/j.ekir.2022.09.030 (PMC9727524; doi:10.1016/j.ekir.2022.09.030), 2022-09-30
Supplement: mmc1.pdf [file mmc1.pdf]

### Supplement materials index

**Supplement Table 1. Perioperative coagulation replacement for ESRD patient with hemophilia**

**Supplement Table 2. Hgb(g/L) measurement during first 14 days after PD catheter insertion.**

**Supplement Table 3. Peritonitis in patients with hemophilia**

**Supplement Table 4. Anemia-supportive medication and average serum iron and ferritin within first 6 months after PD initiation**

**Supplement Table 5. Risk factor for peritonitis in single variable logistic regression in general PD patients (N=553)**

**Supplement Table 1. Perioperative coagulation replacement for ESRD patient with hemophilia**

| Patient | Infusion Type | Day 0                    | Day 1   | Day 2                | Day 3                | Day 4 | Day 5 | Day 6 | Day 7              | Day 8   | Day 9                | Day 10               | Day 11  | Day 12  | Day 13  | Day 14  |
|---------|---------------|--------------------------|---------|----------------------|----------------------|-------|-------|-------|--------------------|---------|----------------------|----------------------|---------|---------|---------|---------|
| 1       | FVIII (IU/kg) | 40 pre-op                | -       | -                    | -                    | -     | -     | -     | -                  | -       | -                    | -                    | -       | -       | -       | -       |
| 2       | FVIII (IU/kg) | 40 pre-op+20<br>after op | 25+12.5 | 25+12.5              | 25+12.5              | 16 qd | 16 qd | 16 qd | 16 qd              | 10 qd   | 10 qd                | 10 qd                | 10 qd   | 10 qd   | 10 qd   | 10 qd   |
| 3       | FVIII (IU/kg) | 36 pre-op                | 10 q12h | 10 q12h              | 10 q12h              | 0     | 0     | 0     | 0                  | 0       | 0                    | <sup>a</sup> 10 q12h | 10 q12h | 10 q12h | 10 q12h | 10 q12h |
| 4       | FVIII (IU/kg) | 30 q12h <sup>b</sup>     | 20 q12h | 20 q12h              | <sup>e</sup> 20 q12h | 15 qd | 15 qd | 15 qd | 15 qd              | 0       | 0                    | 0                    | 0       | 0       | 0       | 0       |
| 5       | PCC (IU/kg)   | 30 q8h <sup>b</sup>      | 30 q8h  | <sup>a</sup> 30 q12h | 30 q12h              | 20 qd | 20 qd | 20 qd | 20 qd              | 20 qd   | 0                    | 0                    | 0       | 0       | 0       | 0       |
| 6       | FVIII (IU/kg) | 40 pre-op→30<br>q12h     | 30 q12h | 40 qd                | 40 qd                | 40 qd | 40 qd | 20 qd | 20 qd              | 20 qd   | 20 qd                | 20 qd                | 20 qd   | 20 qd   | 20 qd   | 0       |
| 7       | FVIII (IU/kg) | 30 q12h <sup>b</sup>     | 15 q12h | 15 q12h              | 15 q12h              | 20 qd | 20qd  | 20 qd | <sup>c</sup> 50+20 | 20 q12h | <sup>d</sup> 20 q12h | 20 q12h              | 20 q12h | 20 q12h | 20 qd   | 20 qd   |
| 8       | PCC (IU/kg)   | 0                        | 0       | 0                    | 0                    | 0     | 0     | 0     | 0                  | 0       | 0                    | 0                    | 0       | 0       | 0       | 0       |

<sup>a</sup> blood-tinged effluent

<sup>b</sup> first dose was given right before surgery

<sup>c</sup> central venous catheter removal

<sup>d</sup> knee bleeding

<sup>e</sup> minor tunnel-exit bleeding

-data unavailable

**Supplement Table 2. Hgb(g/L) measurement during first 14 days after PD catheter insertion.**

| Patient | Day 0 | Day 1 | Day 2           | Day 3           | Day 4 | Day 5 | Day 6 | Day 7 | Day 8 | Day 9        | Day 10          | Day 11 | Day 12 | Day 13 | Day 14 |
|---------|-------|-------|-----------------|-----------------|-------|-------|-------|-------|-------|--------------|-----------------|--------|--------|--------|--------|
| 1       | 105   | -     | -               | -               | -     | -     | -     | -     | -     | -            | -               | -      | -      | -      | 106    |
| 2       | 122   |       |                 | 104             |       | 100   |       |       | 102   |              |                 |        | 109    |        |        |
| 3       | 79    | 80    |                 |                 |       |       |       |       | 75    | 76           | <sup>a</sup> 70 |        | 67     | 64     | 72     |
| 4       | 85    | 83    |                 | 91 <sup>c</sup> |       |       |       | 90    |       |              | 85              |        |        |        | 84     |
| 5       | 79    | 78    | <sup>a</sup> 77 | 71              | 78    |       | 72    | 85    |       |              |                 | 84     |        |        | 88     |
| 6       | 105   |       | 107             |                 |       |       |       |       |       |              |                 |        |        |        | 115    |
| 7       | 76    | 76    |                 |                 |       |       |       | 78    |       | <sup>b</sup> | 64              | 64     |        | 72     |        |
| 8       | 81    |       |                 |                 | 90    |       |       | 90    |       | 88           |                 |        |        |        |        |

<sup>a</sup> blood-tinged effluent

<sup>b</sup> knee bleeding

<sup>c</sup> minor tunnel-exit bleeding

- data unavailable

**Supplement Table 3. Peritonitis in patients with hemophilia**

| <i>Patient</i> | Episode 1                     |                                 |             | Episode 2                     |                                 |                     | Episode 3                    |                                 |         | Episode 4                    |                                 |           | Episode 5                    |                                 |         |
|----------------|-------------------------------|---------------------------------|-------------|-------------------------------|---------------------------------|---------------------|------------------------------|---------------------------------|---------|------------------------------|---------------------------------|-----------|------------------------------|---------------------------------|---------|
|                | Time <sup>a</sup><br>(months) | Duration <sup>b</sup><br>(days) | Culture     | Time <sup>a</sup><br>(months) | Duration <sup>b</sup><br>(days) | Culture             | Time <sup>a</sup><br>(month) | Duration <sup>b</sup><br>(Days) | Culture | Time <sup>a</sup><br>(month) | Duration <sup>b</sup><br>(Days) | Culture   | Time <sup>a</sup><br>(month) | Duration <sup>b</sup><br>(Days) | Culture |
| <i>1</i>       | 78                            | 5                               | Neg.        |                               |                                 |                     |                              |                                 |         |                              |                                 |           |                              |                                 |         |
| <i>2</i>       | 27                            | 9                               | -           | 27                            | 5                               | -                   | 25                           | 3                               | -       | 21                           | 22                              | -         |                              |                                 |         |
| <i>3</i>       | 0                             | 3                               | -           | 7                             | 10                              | Neisseria<br>mucosa | 9                            | 10                              | Neg.    | 33                           | 12                              | Neisseria | 46                           | -                               | Neg.    |
| <i>4</i>       | 1                             | 9                               | Neg.        |                               |                                 |                     |                              |                                 |         |                              |                                 |           |                              |                                 |         |
| <i>5</i>       | 11                            | 10                              | ESBL-E.coli |                               |                                 |                     |                              |                                 |         |                              |                                 |           |                              |                                 |         |
| <i>6</i>       | 1                             | 13                              | Neg.        |                               |                                 |                     |                              |                                 |         |                              |                                 |           |                              |                                 |         |
| <i>7</i>       | 9                             | 11                              | MSSA        |                               |                                 |                     |                              |                                 |         |                              |                                 |           |                              |                                 |         |
| <i>8</i>       |                               |                                 |             |                               |                                 |                     |                              |                                 |         |                              |                                 |           |                              |                                 |         |

Abbreviation: Neg. Negative

<sup>a</sup> months since initiation of PD

<sup>b</sup> based on symptoms and paracentesis cell counts

- data unavailable

**Supplement Table 4. Anemia-supportive medication and average serum iron and ferritin within first 6 months after PD initiation**

| <b>Patient</b> | <b>Roxadustat</b> | <b>EPO Supplement</b>    | <b>FeSO<sub>4</sub> Supplement</b> | <b>Polysaccharide-<br/>Iron Complex</b> | <b>Serum Iron<br/>(ug/dl)</b> | <b>Serum Ferritin<br/>(ng/ml)</b> |
|----------------|-------------------|--------------------------|------------------------------------|-----------------------------------------|-------------------------------|-----------------------------------|
| <b>1</b>       | 0                 | 10000IU qw               | 0                                  | 0                                       | 95                            | 1117                              |
| <b>2</b>       | 0                 | 10000IU qw               | 0.2g bid                           | 0                                       | 79.4                          | 185                               |
| <b>3</b>       | 0                 | 10000IU qw               | 0.2g tid                           | 0                                       | 41.6                          | 242                               |
| <b>4</b>       | 0                 | 10000IU q5d              | 0.2g tid                           | 0                                       | 61                            | 247                               |
| <b>5</b>       | 0                 | 10000IU qw~20000IU<br>qw | 0.2g tid                           | 0                                       | 29.4                          | 308                               |
| <b>6</b>       | 50mg biw          | 0                        | 0                                  | 150mg qd                                | 62                            | 130                               |
| <b>7</b>       | 0                 | 20000IU qw               | 0.2g tid                           | 0                                       | 41                            | 197                               |
| <b>8</b>       | 100mg tiw         | 0                        | 0.1g tid                           | 0                                       | 71                            | 112                               |

**Supplement Table 5. Risk factor for peritonitis in single variable logistic regression in general PD patients (N=553)**

| <b>Risk Variable</b>      | <b>Odd ration</b> | <b>95%CI</b> | <b>P value</b> |
|---------------------------|-------------------|--------------|----------------|
| Male                      | 0.953             | 0.661-1.375  | 0.789          |
| Age (year)                | 1.003             | 0.992-1.014  | 0.635          |
| Diabetes                  | 0.993             | 0.687-1.437  | 0.972          |
| AVD                       | 2.174             | 1.460-3.239  | < 0.001        |
| BMI (Kg/m <sup>2</sup> )  | 0.982             | 0.929-1.039  | 0.527          |
| Dialysis Duration (month) | 0.995             | 0.998-1.001  | 0.106          |
| Tenckhoff Catheter        | 2.287             | 1.135-4.606  | 0.021          |
| APD                       | 0.891             | 0.520-1.527  | 0.674          |
| hsCRP (mg/L)              | 0.998             | 0.991-1.005  | 0.613          |
| NLR                       | 0.971             | 0.903-1.045  | 0.43           |
| Albumin (g/L)             | 0.99              | 0.965-1.016  | 0.455          |
| Hemoglobin (g/L)          | 0.991             | 0.981-1.002  | 0.113          |
| K (mmol/L)                | 1.177             | 0.928-1.494  | 0.18           |
| High or Low in PET        | 0.89              | 0.518-1.531  | 0.674          |

|                                    |       |             |       |
|------------------------------------|-------|-------------|-------|
| <b>NPCR (g/kg-d)</b>               | 0.815 | 0.370-1.796 | 0.612 |
| <b>Kt/V</b>                        | 0.95  | 0.710-1.273 | 0.732 |
| <b>CCr (L/w·1.73m<sup>2</sup>)</b> | 0.995 | 0.989-1.002 | 0.182 |
| <b>rGFR (mL/min)</b>               | 0.965 | 0.908-1.024 | 0.24  |

Abbreviation: AVD: Atherosclerotic vascular disease; PD, peritoneal dialysis; CCI: Charlson Comorbidity Index; BMI, body mass index; NLR: number of neutrophils divided by the number of lymphocytes.; K, serum potassium; nPCR :normalized protein catabolic rate; Kt/V: urea clearance index; CCr: creatinine clearance; rGFR: residual renal glomerular filtration rate; PET: peritoneal equilibration test; hsCRP: high-sensitivity C-reactive protein
